# Supplementary material
Source: Research Square preprint supplement (doi:10.21203/rs.3.rs-9251960/v1)

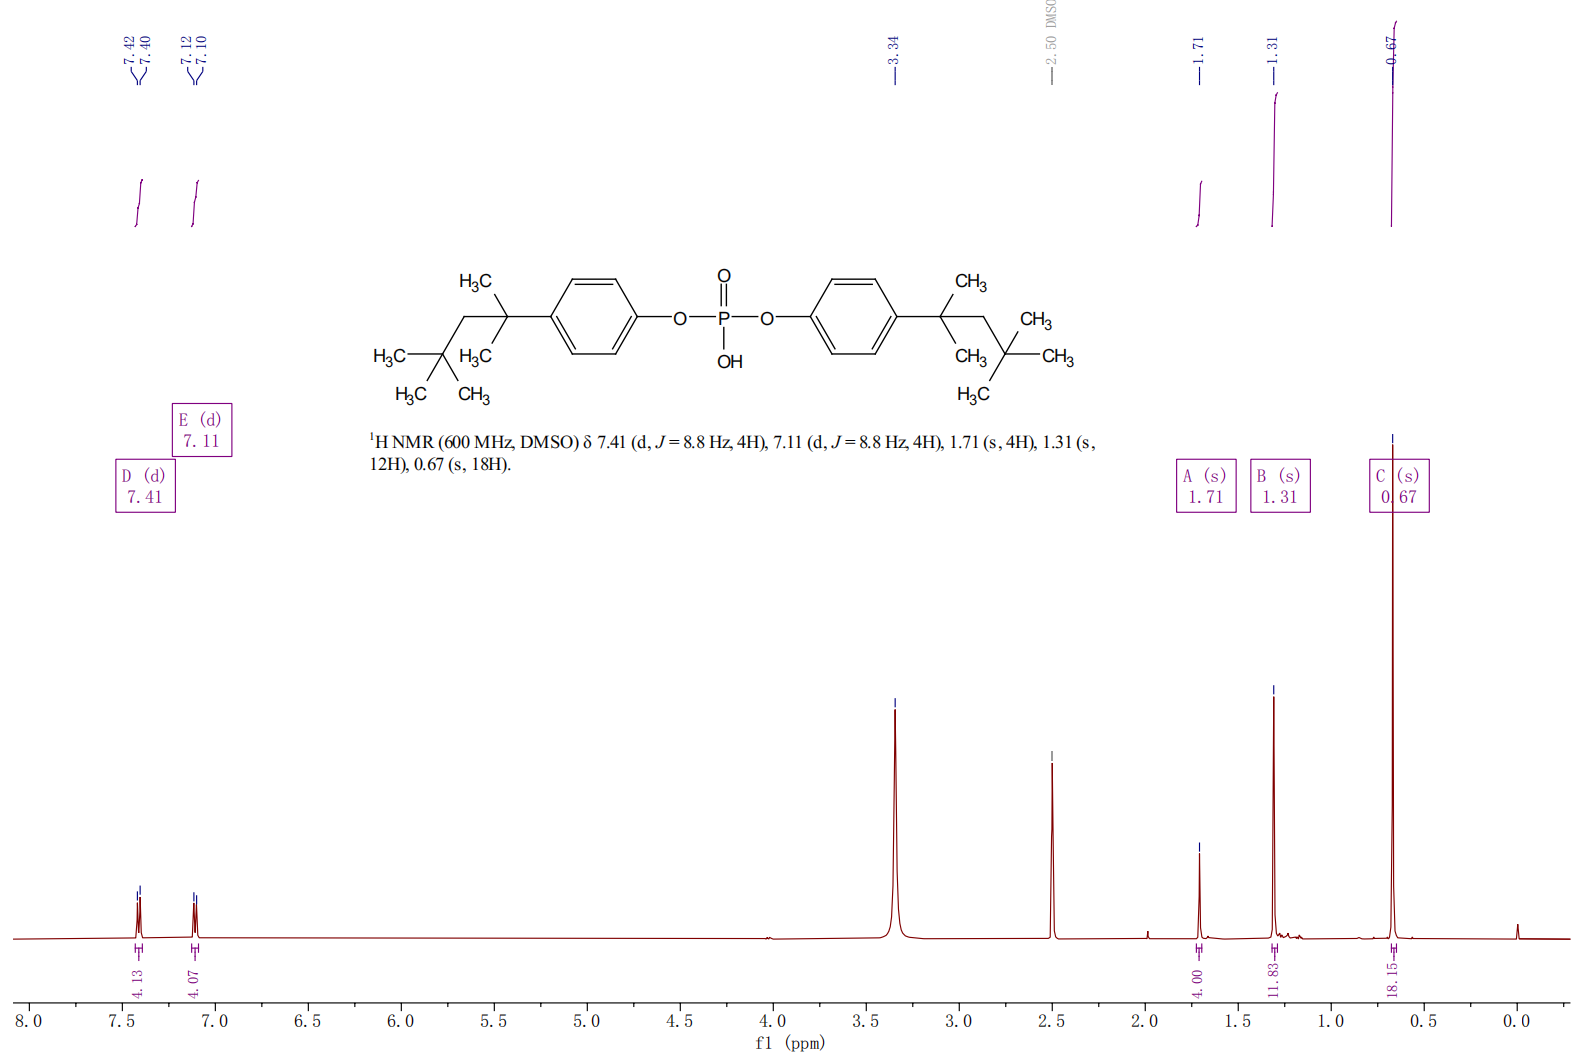


图1.2 DTOPPA 的 1H NMR

Supplement: Supplementary file 1 [file edd5d354ecfc7e0379f12a7e.docx]
